# Supplementary material
Source: Springer Nature journal article supplement (https://www.springerprofessional.de/resource/supplementary/13677_2012_13_MOESM9_ESM.pdf/10743464)

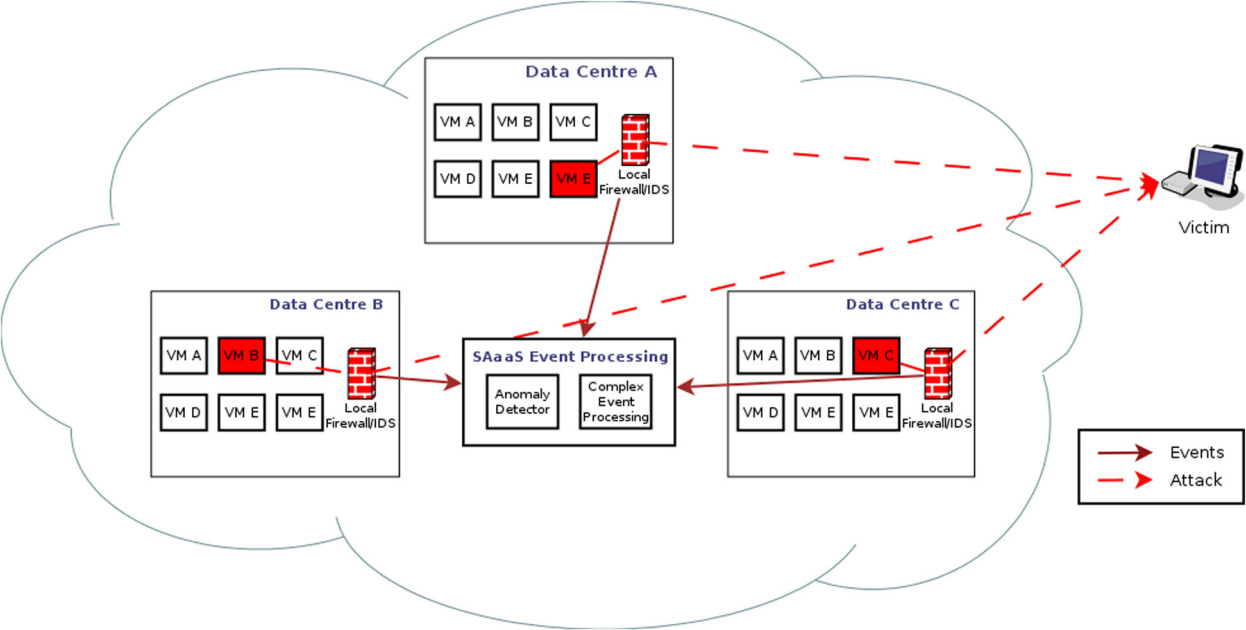

Supplement: MOESM9 [file 10743464]
